# Supplementary material
Source: publisher site journal article supplement (https://static.cambridge.org/content/id/urn:cambridge.org:id:article:S1751731120000774/resource/name/S1751731120000774supp001.doc)
Supplement: Supplementary file 1 [file S1751731120000774supp001.doc]

**Animal: An International Journal of Animal Bioscience**

**Effect of oat hay provision method on growth performance, rumen fermentation and blood metabolites of dairy calves during preweaning and postweaning periods**

M. Gąsiorek1, B. Stefańska1, E. Pruszyńska-Oszmałek2, M. Taciak3, J. Komisarek4 and W. Nowak1

*1Department of Animal Nutrition, Poznań University of Life Sciences, 33 Wołyńska Street, 60-637 Poznań, Poland*

***2****Department of Animal Physiology and Biochemistry, Poznań University of Life Science, 35 Wołyńska Street, 60-637 Poznań, Poland*

*3The Kielanowski Institute of Animal Physiology and Nutrition, Polish Academy of Sciences, Department of Animal Nutrition, 3 Instytucka Street, 05-110 Jabłonna, Poland*

*4Department of Animal Breeding and Product Quality Assessment, Poznań University of Life Sciences, Złotniki, 1 Słoneczna Street, 62-002 Suchy Las, Poland*

Corresponding author: Barbara Stefańska. Email: [barbara.stefanska@up.poznan.pl](mailto:barbara.stefanska@up.poznan.pl)

**Supplementary material**

***Supplementary Table S1*** *Nutritional value of oat hay and experimental starter feed ingredients for dairy calves (% DM unless stated)*

| Item | Treatments1 | | Oat hay2 |
| --- | --- | --- | --- |
| CON and FC | OH and OH-FC3 |
| Ingredient | | | |
| Soybean meal | 23.2 | 27.1 |  |
| Wheat bran | 20.0 | 20.0 |  |
| Barley meal | 24.0 | 16.4 |  |
| Wheat meal | 21.3 | 15.0 |  |
| Corn meal | 10.0 | 10.0 |  |
| Oat hay | - | 10.0 |  |
| Vitamin and mineral premix4 | 1.50 | 1.50 |  |
| Nutritional value | | | |
| Dry matter (% as-fed) | 83.6 | 85.6 | 91.0 |
| Crude Protein (CP) | 20.0 | 20.3 | 9.10 |
| Neutral detergent fiber (NDF) | 17.8 | 24.2 | 77.6 |
| Acid detergent fiber (ADF) | 9.10 | 10.5 | 32.8 |
| starch | 36.7 | 30.9 | 0.71 |
| Ether extract | 2.50 | 2.50 | 2.40 |
| Ash | 6.50 | 6.60 | 5.00 |
| Ca | 0.91 | 0.92 | 0.35 |
| P | 0.76 | 0.77 | 0.27 |
| Na | 0.15 | 0.15 | 0.05 |
| Mg | 0.30 | 0.30 | 0.10 |

1 Treatment - CON (control, starter without oat hay), OH (starter feed containing 10% DM basis oat hay), OH-FC (starter feed containing 10% DM basis oat hay and oat hay fed as free-choice provision in different bucket), FC (starter feed and oat hay fed as free-choice provision in different bucket).

2 Chopped oat hay contained 30.9, 35.4, 25.2 and 8.5% DM of long (>19 mm), medium (19 to 8 mm), short (8 to 1.18 mm), and fine (< 1.18 mm) particles, respectively. Particle length variables were measured using the Penn State Particle Separator (The Pennsylvania State University Park; Kononoff et al., 2003)

3 Starter feed with 10% of oat hay/kg DM used in OH and OH-FC groups contained 2.0, 35.0, 55.0 and 8.0% DM of long (>19 mm), medium (19 to 8 mm), short (8 to 1.18 mm), and fine (< 1.18 mm) particles, respectively.

4 Vitamin and mineral premix per kg of supplement – 250 000 IU of vitamin A, 50 000 IU of vitamin D,
1 500 IU of vitamin E, 2.25 g of Mn, 120 g of Ca, 7.7 g of Zn, 20 g of P, 20.5 g of Mg, 186 g of Na, 1.25 g of Fe, 3 g of S, 14 mg of Co, 1.25 g of Cu, 56 mg of I, and 10 mg of Se.

**Supplementary material S1** Methodology and results of quality control tests for volatile fatty acids (VFA) determination.

Ruminal fluid (5 mL) after mixing with 0.5 mL of 85% of formic acid was centrifuged for 10 min at 10 000 x g at room temperature. Next, the 500 mL of supernatants were transferred into chromatographic vials and mixed with 75 mL of isocaproic acid (1% v/v in ddH2O, internal standard; IS). Samples were analysed in duplicate, using a HP 5890 Series II gas chromatograph (Hewlett-Packard, Waldbronn, Germany) with a flame-ionization detector (FID) and Supelco Nukol (Supelco, Bellefonte, PA, USA) fused silica capillary column (30 m x 0.25 mm i.d.; 0.25 mm). Helium was used as the carrier gas with a flow rate of 103 mL/min. The oven was initially kept at 100 °C for 2 min, then heated at 10 °C/min to 140 °C and held for 20 min. The injector temperature was maintained at 220 °C, while the detector was kept at 250 °C. The total run time was approximately 27 min. Concentrations of individual VFA were estimated in relation to IS using a mixture of VFA standard solutions, all purchased at Sigma-Aldrich, Darmstadt, Germany. The method was validated in terms of specificity, linearity, accuracy, and limit of quantification. The tested validation parameters were found to be within acceptable limits i.e.: peaks corresponding to the analyzed components were well separated; linearity correlation coefficient for each VFA was ≥ 0.999; variation coefficient between successive samples at the same concentration level was ≤ 4%; concentrations of analysed VFA in all rumen samples were higher than a limit of quantification which was set at 10:1 signal-to-noise ratio.

**Supplementary material S2** Methodology and results of quality control tests for biochemical blood indices determination.

In blood serum, the level of BUN (mg/dl) using Liquid Urea Nitrogen (BUN) Reagent Set (no. B7552), BHBA (mmol/l) using β-Hydroxybutyrate (BHB) Reagent Set (no. H7587-58) and total protein (g/dl) using Total Protein (Biuret) Reagent Set (no. T7528) were measured. These kits based on the enzymatic, colorimetric method were purchased from Pointe Scientific INC (Warsaw, Poland).

The determination of blood parameters (BUN, BHBA, total protein) was made in accordance with the manufacturer's instruction, but with some modifications. We used the 96-well plates and reduced the volume of serum and reagents in an appropriate proportion (diluted at 1:1 ratio). After pipetting standards, samples and reagents, the plates were placed in a Thermo Shaker (PST-100 HL, Biosan, Riga, Latvia) and incubated at 37 °C for 5 minutes with gentle shaking (350 rpm). The absorbance of the plate well contents was measured in the Microplate Reader Synergy 2 (BioTek, Biokom, Bad Friedrichshall, Germany) at 37 °C with mixing for 20 seconds before reading. The absorbance for BUN, BHBA, and total protein were measured respectively at 450 nm, 505 nm, and 450nm.

The concentration of non-esterified fatty acids (NEFA) was analyzed according to Duncombe’s colorimetric method (Duncombe, 1964) with some modification. Following reagents were prepared for determination of NEFA level: 1 M triethanolamine, 1 N acetic acid, 6.45% (w/v) Cu(NO3)2 x 3H2O (these reagents were used to prepare the copper solution, in a 9:1:10 ratio, respectively) and 0.1% (w/v) sodium diethyldithiocarbamate solution in butanol. All reagents were purchased from Sigma-Aldrich (Darmstadt, Germany). Water (as a blank), standard and blood serum were pipetted into properly labeled tubes, then chloroform and the copper solution were added. The tubes were shaken vigorously for at least 2 min and centrifuged for 20 minutes at 3 500 x g (Thermo Scientific Heraeus Megafuge 40R, Langenselbold, Germany). After centrifugation, the upper (aqueous) phase and a disc of precipitated protein were aspirated leaving the chloroform phase free of particles and the surface clean. The chloroform phase was transferred into new tubes and the sodium diethyldithiocarbamate solution was added and mixed thoroughly. The spectrophotometer (Cecil CE 1021 Low Cost UV/Visible Spectrophotometer from Cecil Instruments, Konica Minolta, Berlin, Niemcy) was zeroed against the blank and the absorbance was measured at 440 nm.

Serum insulin-like growth factor-I (IGF-I) was analyzed by a radioimmunoassay method (RIA) using the Non-Extraction IGF-1 IRMA DSL-2800 (Diagnostic Systems Laboratories Inc., Webster, TX, USA). The concentration of this hormone was determined with isotope J125 by using the automatic gamma radiation reader (Wizard2 2-Detector Gamma Counter, Perkin Elmer, Hidex, Stow, USA). In this method the peptide being determined is “sandwiched” between two antibodies. The tubes were coated by the first antibody. The second one (Anti-IGF-1 [J-125] Reagent) was radiolabeled for detection. The analytic peptide (IGF-1) presents in blood serum, standards and controls were bound by both of the antibodies to form a “sandwich” complex. Unbound compounds were removed by decanting. The inter- and intra-assay variation was controlled by limiting the coefficient of variation to ≤ 5%for all blood variables.

**Supplementary Table 2 Effect of method of oat hay provision on rumen fermentation measurements in dairy calves**

| Item | Time2 | Treatment1 | | | | SEM | *P*-values |
| --- | --- | --- | --- | --- | --- | --- | --- |
| CON | OH | OH-FC | FC | Treatment |
| VFA3 proportion (%) | | | | | | | |
| Acetate | 28 | 48.7 | 51.2 | 54.0 | 49.9 | 1.54 | 0.15 |
| 56 | 49.0 | 49.4 | 54.5 | 46.4 | 1.04 | 0.21 |
| 84 | 49.0 | 50.4 | 52.8 | 50.3 | 0.88 | 0.34 |
| Propionate | 28 | 34.6 | 34.8 | 30.0 | 31.3 | 0.69 | 0.56 |
| 56 | 35.0 | 33.3 | 28.5 | 36.1 | 0.95 | 0.64 |
| 84 | 34.6 | 31.7 | 30.2 | 33.5 | 0.99 | 0.49 |
| N-butyrate | 28 | 12.8 | 10.5 | 12.2 | 14.3 | 0.59 | 0.36 |
| 56 | 11.6 | 12.7 | 12.9 | 12.9 | 0.59 | 0.46 |
| 84 | 11.6 | 13.4 | 12.5 | 11.9 | 0.62 | 0.69 |
| N-valerate | 28 | 2.7 | 2.3 | 2.9 | 3.5 | 0.29 | 0.12 |
| 56 | 3.4 | 3.7 | 3.2 | 3.4 | 0.27 | 0.25 |
| 84 | 3.2 | 3.6 | 3.5 | 2.9 | 0.40 | 0.31 |
| Iso-valerate | 28 | 1.3 | 1.1 | 0.8 | 1.0 | 0.69 | 0.56 |
| 56 | 1.1 | 1.0 | 0.9 | 1.2 | 0.95 | 0.64 |
| 84 | 1.5 | 1.0 | 1.0 | 1.4 | 0.99 | 0.49 |

1 Treatment - CON (control, starter without oat hay), OH (starter feed containing 10% DM basis oat hay), OH-FC (starter feed containing 10% DM basis oat hay and oat hay fed as free-choice provision in different bucket), FC (starter feed and oat hay fed as free-choice provision in different bucket).

2 Time - age of calf (d).

3 VFA - volatile fatty acids.

**References**

Duncombe WG 1964. The colorimetric micro-determination of non-esterified fatty
 acids in plasma. [Clinica Chimica Acta 9, 122-125.](https://www.google.com/url?sa=t&rct=j&q=&esrc=s&source=web&cd=2&cad=rja&uact=8&ved=2ahUKEwj6n4bNl6TnAhXxy6YKHVCnAzEQFjABegQIDhAC&url=https%3A%2F%2Fwww.journals.elsevier.com%2Fclinica-chimica-acta&usg=AOvVaw0xA2zlw3aI1NbdNDnxUknf)

[Kononoff PJ](https://www.ncbi.nlm.nih.gov/pubmed/?term=Kononoff PJ%5BAuthor%5D&cauthor=true&cauthor_uid=12778598), [Heinrichs AJ](https://www.ncbi.nlm.nih.gov/pubmed/?term=Heinrichs AJ%5BAuthor%5D&cauthor=true&cauthor_uid=12778598), and DR [Buckmaster](https://www.ncbi.nlm.nih.gov/pubmed/?term=Buckmaster DR%5BAuthor%5D&cauthor=true&cauthor_uid=12778598)  2003. Modification of the Penn State forage and total mixed ration particle separator and the effects of moisture content on its measurements. Journal of Dairy Science 86, 1858-1863.
